# Supplementary material for: Impact of reduced anthropogenic emissions during COVID-19 on air quality in India
Source: Copernicus journal article supplement (doi:10.5194/acp-21-4025-2021), 2021-03-17
Supplement: Supplementary file 1 [file acp-21-4025-2021-supplement.pdf]

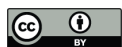

*Supplement of*

## **Impact of reduced anthropogenic emissions during COVID-19 on air quality in India**

**Mengyuan Zhang et al.**

*Correspondence to:* Peng Wang ([peng.ce.wang@polyu.edu.hk](mailto:peng.ce.wang@polyu.edu.hk)) and Hongliang Zhang ([zhanghl@fudan.edu.cn](mailto:zhanghl@fudan.edu.cn))

The copyright of individual parts of the supplement might differ from the article licence.

**Table S1: Scaling factors of the energy sector for different states to convert emissions from 2010 to 2019.**

| State             | PM    | VOCs  | NO <sub>x</sub> | SO <sub>2</sub> |
|-------------------|-------|-------|-----------------|-----------------|
| Andhra Pradesh    | 1.203 | 1.226 | 1.230           | 1.225           |
| Arunachal Pradesh | 1.203 | 1.380 | 1.380           | 1.357           |
| Assam             | 1.308 | 1.238 | 1.545           | 1.244           |
| Bihar             | 2.016 | 2.059 | 2.063           | 2.063           |
| Chhattisgarh      | 1.955 | 2.142 | 2.157           | 2.141           |
| Capital Region    | 0.445 | 1.416 | 0.445           | 0.445           |
| Goa               | 1.696 | 0.881 | 0.881           | 0.881           |
| Gujarat           | 1.696 | 1.904 | 1.941           | 1.898           |
| Haryana           | 1.366 | 1.547 | 1.720           | 1.546           |
| Himachal Pradesh  | 1.190 | 1.190 | 1.190           | 1.190           |
| Jammu&kashmir     | 1.190 | 1.190 | 1.190           | 1.190           |
| Jharkhand         | 2.578 | 2.642 | 2.641           | 2.638           |
| Karnataka         | 1.674 | 1.702 | 1.737           | 1.712           |
| Kerala            | 1.190 | 1.190 | 1.190           | 1.190           |
| Madhya Pradesh    | 1.704 | 1.928 | 1.950           | 1.933           |
| Maharashtra       | 1.509 | 1.737 | 1.760           | 1.731           |
| Manipur           | 1.704 | 1.785 | 1.785           | 1.785           |
| Meghalaya         | 1.216 | 1.226 | 1.269           | 1.227           |
| Mizoram           | 1.216 | 1.309 | 1.309           | 1.309           |
| Nagaland          | 1.216 | 1.464 | 1.464           | 1.464           |
| Odisha            | 1.247 | 1.345 | 1.363           | 1.351           |
| Punjab            | 0.791 | 1.012 | 1.012           | 1.012           |
| Rajasthan         | 1.344 | 1.583 | 1.652           | 1.580           |
| Sikkim            | 1.344 | 1.131 | 1.131           | 1.131           |
| Tamil Nadu        | 2.211 | 2.332 | 2.382           | 2.331           |
| Telangana         | 3.956 | 3.998 | 4.010           | 3.994           |
| Tripura           | 1.461 | 1.202 | 1.202           | 1.202           |
| Uttar Pradesh     | 1.461 | 1.595 | 1.616           | 1.598           |
| Uttarakhand       | 1.596 | 2.404 | 2.409           | 2.409           |
| West Bengal       | 1.361 | 1.499 | 1.502           | 1.501           |

**Table S2: Scaling factors of on-road and off-road sectors for different states to convert emissions from 2010 to 2019.**

| State             | PM    | VOCs  | NO <sub>x</sub> | SO <sub>2</sub> |
|-------------------|-------|-------|-----------------|-----------------|
| Andhra Pradesh    | 1.000 | 1.186 | 1.138           | 1.355           |
| Arunachal Pradesh | 1.195 | 1.424 | 1.405           | 1.641           |
| Assam             | 1.020 | 1.210 | 1.153           | 1.379           |
| Bihar             | 0.985 | 1.169 | 1.109           | 1.330           |
| Chhattisgarh      | 1.167 | 1.389 | 1.352           | 1.593           |
| Capital Region    | 1.097 | 1.326 | 1.559           | 1.591           |
| Goa               | 0.787 | 0.925 | 0.802           | 1.028           |
| Gujarat           | 1.133 | 1.352 | 1.342           | 1.560           |
| Haryana           | 0.960 | 1.145 | 1.139           | 1.322           |
| Himachal Pradesh  | 1.041 | 1.240 | 1.220           | 1.427           |
| Jammu & Kashmir   | 1.036 | 1.233 | 1.194           | 1.413           |
| Jharkhand         | 1.089 | 1.297 | 1.277           | 1.493           |
| Karnataka         | 1.202 | 1.432 | 1.413           | 1.648           |
| Kerala            | 1.140 | 1.359 | 1.348           | 1.568           |
| Madhya Pradesh    | 1.069 | 1.270 | 1.222           | 1.452           |
| Maharashtra       | 0.982 | 1.167 | 1.134           | 1.339           |
| Manipur           | 1.579 | 1.877 | 1.795           | 2.144           |
| Meghalaya         | 0.908 | 1.081 | 1.054           | 1.240           |
| Mizoram           | 1.167 | 1.390 | 1.361           | 1.598           |
| Nagaland          | 0.981 | 1.172 | 1.194           | 1.361           |
| Odisha            | 1.000 | 1.186 | 1.134           | 1.354           |
| Punjab            | 0.950 | 1.132 | 1.128           | 1.308           |
| Rajasthan         | 1.159 | 1.379 | 1.353           | 1.586           |
| Sikkim            | 0.857 | 1.014 | 0.952           | 1.152           |
| Tamil Nadu        | 0.992 | 1.177 | 1.127           | 1.345           |
| Telangana         | 1.000 | 1.186 | 1.138           | 1.355           |
| Tripura           | 0.958 | 1.138 | 1.090           | 1.301           |
| Uttar Pradesh     | 0.976 | 1.159 | 1.110           | 1.323           |
| Uttarakhand       | 1.072 | 1.276 | 1.239           | 1.463           |
| West Bengal       | 0.969 | 1.151 | 1.109           | 1.316           |

5 **Table S3: Scaling factors of nationwide emissions of agriculture, industry, and residential sectors from 2010 to 2019.**

|             | PM    | VOCs  | NO <sub>x</sub> | SO <sub>2</sub> |
|-------------|-------|-------|-----------------|-----------------|
| Agriculture | 1.071 | 1.333 | 1.060           | 0.915           |
| Industry    | 1.749 | 1.687 | 1.674           | 1.622           |
| Residential | 1.229 | 1.230 | 1.223           | 1.194           |

**Table S4: The comprehensive list of the Indian industries. This classification based on the degree of air pollution caused, including very polluting (VP), medium polluting (MP), and low polluting (LP) industries.**

| S.No. | VP              | MP                     | LP                     |
|-------|-----------------|------------------------|------------------------|
| 01.   | Aluminum        | Automobile             | Advertising            |
| 02.   | Cement          | Cotton                 | <b>Agricultural</b>    |
| 03.   | Construction    | Hotel                  | Aviation               |
| 04.   | Copper          | Jute                   | Banking                |
| 05.   | <b>Dairy</b>    | <b>Pharmaceuticals</b> | Bio-Technology         |
| 06.   | Diamond         | Tractor                | <b>Biscuit</b>         |
| 07.   | Fashion         | Weaving                | <b>Chocolate</b>       |
| 08.   | Fertilizer      |                        | Cosmetic               |
| 09.   | Film            |                        | Cottage                |
| 10.   | Granite         |                        | Electronic             |
| 11.   | Jewelry         |                        | <b>Food Processing</b> |
| 12.   | Mining          |                        | Furniture              |
| 13.   | Oil             |                        | Garment                |
| 14.   | Paint           |                        | Insurance              |
| 15.   | Paper           |                        | IT                     |
| 16.   | <b>Power</b>    |                        | Leather                |
| 17.   | <b>Printing</b> |                        | Music                  |
| 18.   | Rubber          |                        | Mutual Fund            |
| 19.   | Silk            |                        | Pearl                  |
| 20.   | <b>Soap</b>     |                        | <b>Poultry</b>         |
| 21.   | Steel           |                        | Plastic                |
| 22.   | <b>Sugar</b>    |                        | Railway                |
| 23.   | Textile         |                        | Real Estate            |

|     |         |            |
|-----|---------|------------|
| 24. | Tobacco | Retail     |
| 25. | Zinc    | Shipping   |
| 26. |         | Solar      |
| 27. |         | Telecom    |
| 28. |         | Television |
| 29. |         | Tourism    |
| 30. |         | Toys       |
| 31. |         | Turbine    |

Note: The industries marked as bold are assumed to be functioning in the lockdown.

10

**Table S5: Model performance of meteorological parameters temperature at 2m above the surface (T2), wind speed (WS), wind direction (WD), and relative humidity (RH) from February 21 to April 24, 2020 (PRE is mean prediction; OBS is mean observation; MB is mean bias; GE is gross error; RMSE is root mean square error).**

| Variable | Statistics | Feb/21-Mar/23 | Mar/24-Apr/24 | Benchmark* |
|----------|------------|---------------|---------------|------------|
| T2 (K)   | PRE        | 279.6         | 283.9         |            |
|          | OBS        | 281.0         | 285.1         |            |
|          | MB         | <b>-1.5</b>   | <b>-1.2</b>   | ≤±0.5      |
|          | GE         | <b>3.0</b>    | <b>3.1</b>    | ≤2.0       |
|          | RMSE       | 4.3           | 4.3           |            |
| WS (m/s) | PRE        | 4.1           | 4.1           |            |
|          | OBS        | 3.2           | 3.4           |            |
|          | MB         | <b>0.9</b>    | <b>0.7</b>    | ≤±0.5      |
|          | GE         | 1.7           | 1.8           | ≤2.0       |
|          | RMSE       | <b>2.3</b>    | <b>2.3</b>    | ≤2.0       |
| WD (°)   | PRE        | 176.7         | 172.7         |            |
|          | OBS        | 179.5         | 176.1         |            |
|          | MB         | 3.2           | 2.6           | ≤±10       |
|          | GE         | <b>55.2</b>   | <b>53.0</b>   | ≤30        |
|          | RMSE       | <b>71.8</b>   | <b>69.7</b>   | ≤30        |
| RH (%)   | PRE        | 63.3          | 61.3          |            |

|      |      |      |
|------|------|------|
| OBS  | 67.0 | 66.8 |
| MB   | -3.7 | -5.4 |
| GE   | 12.3 | 13.1 |
| RMSE | 15.6 | 16.7 |

Note: \* are benchmarks limits suggested by Emery et al. (2001), data that do not fall under the limits are shown as bold.

15

**Table S6: Indices used to evaluate model performance.**

| Index                         | Definition*                                                     | Remarks       |
|-------------------------------|-----------------------------------------------------------------|---------------|
| Mean bias (MB)                | $\frac{1}{N} \sum_{i=1}^N (P_i - O_i)$                          |               |
| Root mean square error (RMSE) | $\sqrt{\frac{1}{N} \sum_{i=1}^N (P_i - O_i)^2}$                 | Reported as % |
| Gross Error (GE)              | $\frac{1}{N} \sum_{i=1}^N \frac{ P_i - O_i }{O_i}$              | Reported as % |
| Mean normalized bias (MNB)    | $\frac{1}{N} \sum_{i=1}^N \frac{(P_i - O_i)}{O_i}$              | Reported as % |
| Mean normalized error (MNE)   | $\frac{1}{N} \sum_{i=1}^N \left  \frac{P_i - O_i}{O_i} \right $ | Reported as % |
| Mean fractional bias (MFB)    | $\frac{2}{N} \sum_{i=1}^N \frac{(P_i - O_i)}{(P_i + O_i)}$      | Reported as % |
| Mean fractional error (MFE)   | $\frac{2}{N} \sum_{i=1}^N \frac{ P_i - O_i }{(P_i + O_i)}$      | Reported as % |

Note: \* i represents the pairing of N observations O and predictions P by site and time.

20 **Table S7: model performance of O<sub>3</sub> (ppb), PM<sub>2.5</sub> (µg m<sup>-3</sup>), CO (ppb), and NO<sub>2</sub> (ppb) at Delhi, Mumbai, Chennai, Hyderabad, and Bengaluru (OBS is mean observation; PRE is mean prediction; MFB is mean fractional bias; MFE is mean fractional error; MNB is mean normalized bias; MNE is mean normalized error).**

| Variable | Statistics | Delhi | Mumbai | Chennai | Hyderabad | Bengaluru | ALL | Benchmark* |
|----------|------------|-------|--------|---------|-----------|-----------|-----|------------|
|----------|------------|-------|--------|---------|-----------|-----------|-----|------------|

|                   |     |       |       |              |             |              |       |        |
|-------------------|-----|-------|-------|--------------|-------------|--------------|-------|--------|
| O <sub>3</sub>    | OBS | 61.37 | 56.64 | 49.94        | 44.03       | 47.66        | 51.93 |        |
|                   | PRE | 56.86 | 47.06 | 39.32        | 52.56       | 43.58        | 47.88 |        |
|                   | MNB | -0.04 | -0.13 | <b>-0.20</b> | <b>0.20</b> | -0.07        | -0.05 | ≤±0.15 |
|                   | MNE | 0.20  | 0.28  | 0.29         | 0.22        | 0.26         | 0.25  | ≤0.30  |
|                   | MFB | -0.08 | -0.20 | -0.27        | 0.17        | -0.17        | -0.11 |        |
|                   | MFE | 0.21  | 0.32  | 0.36         | 0.18        | 0.33         | 0.28  |        |
| PM <sub>2.5</sub> | OBS | 58.08 | 33.10 | 23.09        | 33.09       | 33.79        | 36.23 |        |
|                   | PRE | 38.10 | 21.46 | 15.57        | 18.28       | 16.29        | 21.94 |        |
|                   | MNB | -0.16 | -0.28 | -0.12        | -0.41       | -0.41        | -0.28 |        |
|                   | MNE | 0.54  | 0.44  | 0.46         | 0.47        | 0.51         | 0.48  |        |
|                   | MFB | -0.40 | -0.46 | -0.30        | -0.59       | <b>-0.66</b> | -0.48 | ≤±0.6  |
|                   | MFE | 0.62  | 0.59  | 0.51         | 0.63        | 0.73         | 0.61  | ≤0.75  |
| NO <sub>2</sub>   | OBS | 13.87 | 11.17 | 3.74         | 10.60       | 10.68        | 10.01 |        |
|                   | PRE | 7.00  | 9.68  | 4.34         | 3.04        | 8.64         | 6.54  |        |
|                   | MNB | -0.51 | 0.42  | 0.46         | -0.74       | -0.30        | -0.14 |        |
|                   | MNE | 0.74  | 1.34  | 1.11         | 0.86        | 0.89         | 0.99  |        |
|                   | MFB | -1.00 | -0.47 | -0.20        | -1.44       | -0.90        | -0.80 |        |
|                   | MFE | 1.13  | 1.18  | 0.82         | 1.51        | 1.19         | 1.17  |        |
| CO                | OBS | 0.69  | 0.65  | 0.45         | 0.38        | 0.74         | 0.58  |        |
|                   | PRE | 0.26  | 0.16  | 0.12         | 0.13        | 0.14         | 0.16  |        |
|                   | MNB | -0.59 | -0.72 | -0.71        | -0.61       | -0.78        | -0.68 |        |
|                   | MNE | 0.59  | 0.72  | 0.71         | 0.61        | 0.78         | 0.68  |        |
|                   | MFB | -0.88 | -1.15 | -1.13        | -0.92       | -1.32        | -1.08 |        |
|                   | MFE | 0.89  | 1.15  | 1.13         | 0.92        | 1.32         | 1.08  |        |

Note: \* are benchmarks limits suggested by EPA (2007) for PM<sub>2.5</sub> and EPA (2005) for O<sub>3</sub>, data that do not fall under the limits are shown as bold.

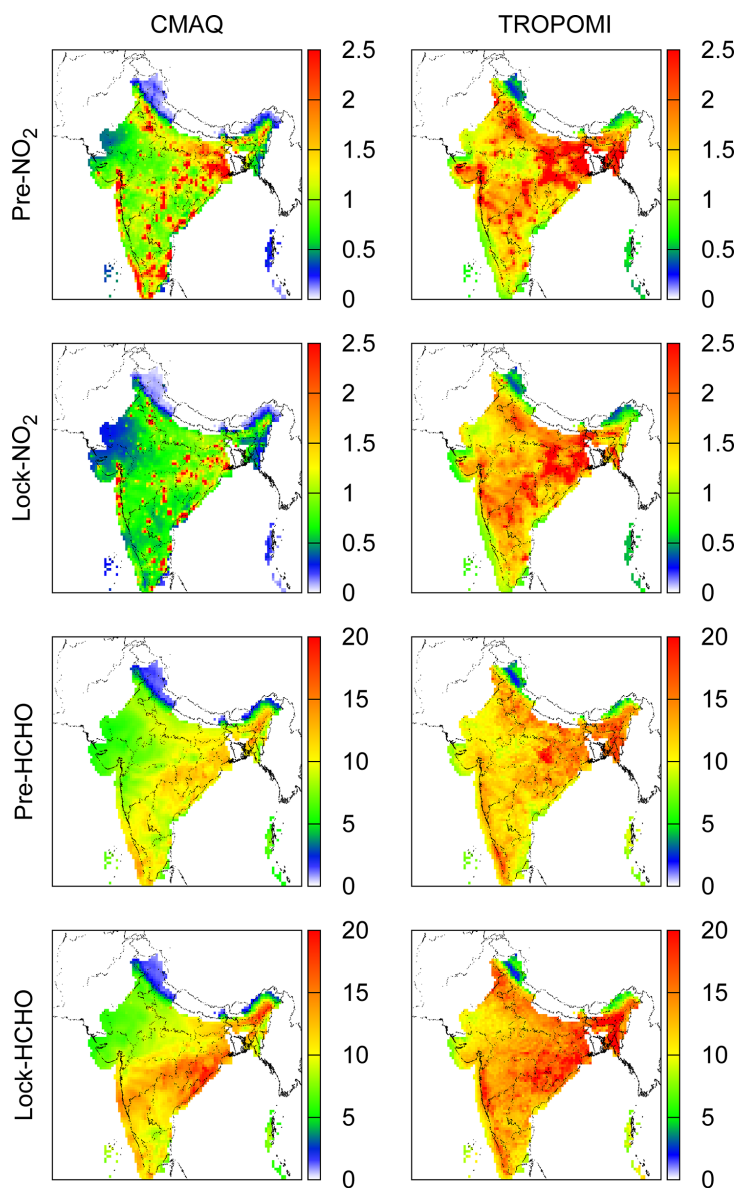

25

**Figure S1: Comparison of the simulated and satellite-observed NO<sub>2</sub> and HCHO column number density before lockdown and during the lockdown in India. The unit is 10<sup>15</sup> molec cm<sup>-2</sup>.**



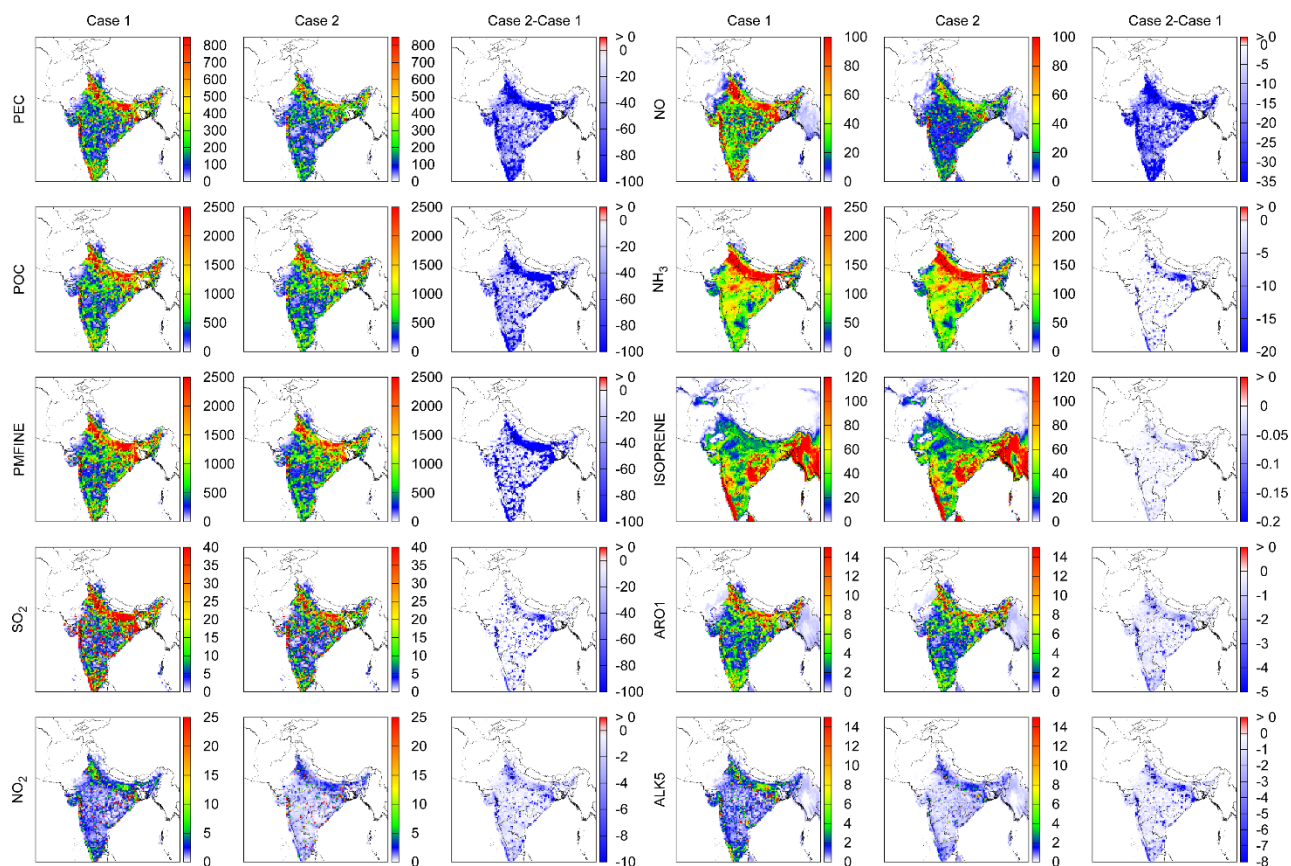

30 **Figure S2: Comparison and difference of India's emissions before and after anthropogenic emission reduction on March 24, 2020; PEC, POC, and PMFINE are in the unit of  $\text{g s}^{-1}$  and the other parameters are in the unit of  $\text{moles s}^{-1}$ . (PEC is primary elemental carbon; POC is primary organic carbon; PMFINE is fine particulate matter; ISOPRENE is isoprene; ARO1 means aromatics with  $k_{\text{OH}} < 2 \times 10^4 \text{ ppm}^{-1} \text{ min}^{-1}$ ; ALK5 means alkanes and other non-aromatic compounds that react only with OH, and have  $k_{\text{OH}}$  greater than  $1 \times 10^4 \text{ ppm}^{-1} \text{ min}^{-1}$ .) “Case2 - Case1” indicates (Case**

35 **2 – Case 1)/Case 1, reported as %.**

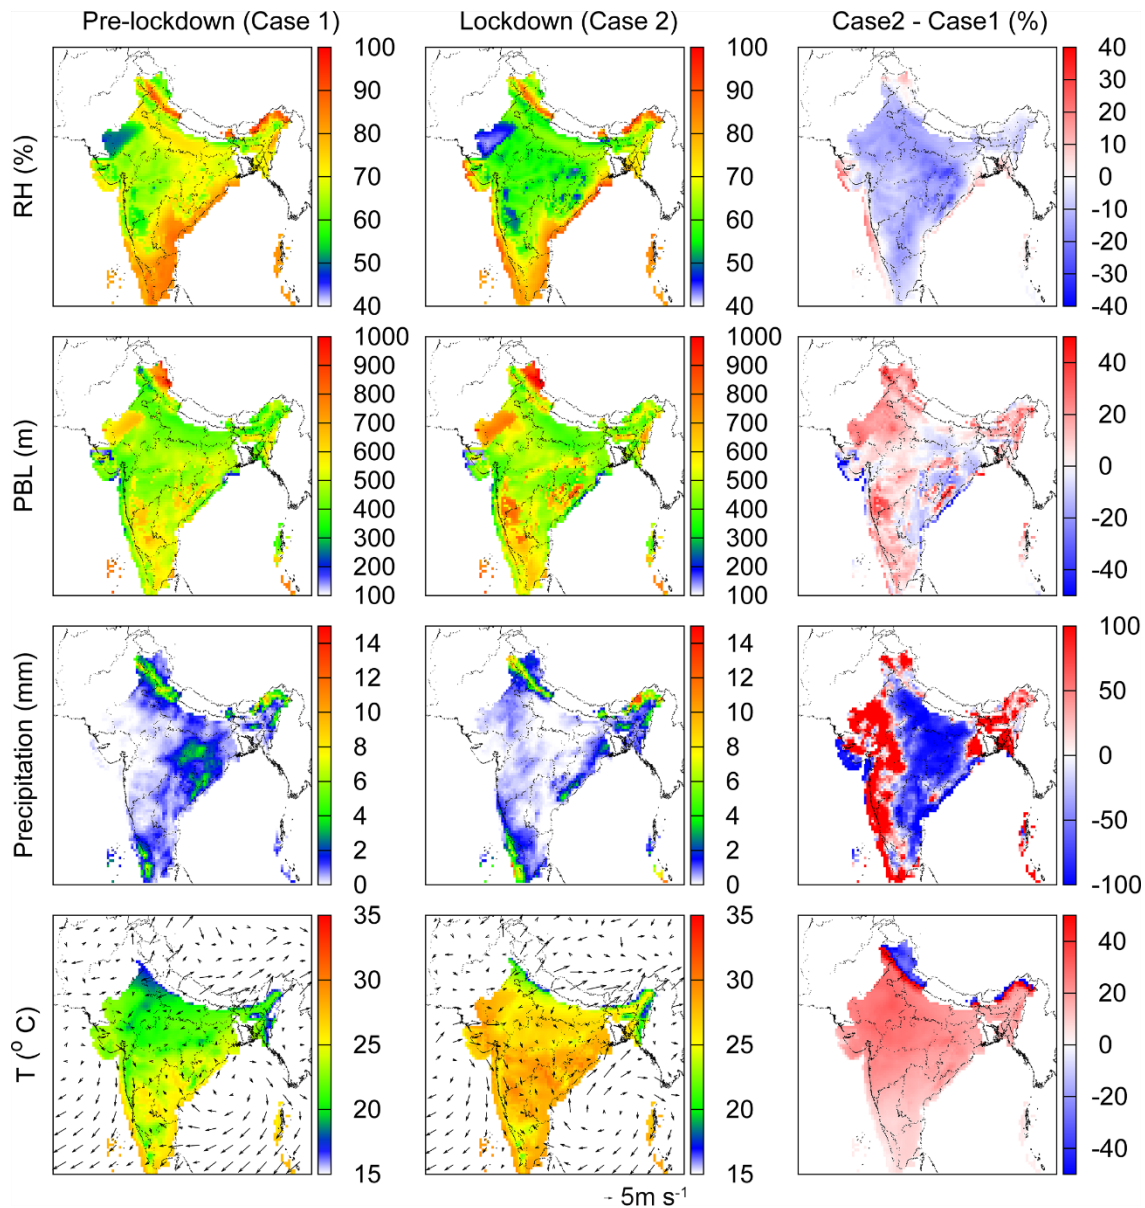

**Figure S3: Distribution of simulated temperature (T), relative humidity (RH), planetary boundary layer (PBL) height, the average daily precipitation, and wind fields in India before and during the lockdown period. “Case2 - Case1” indicates  $(\text{Case 2} - \text{Case 1})/\text{Case 1}$ , reported as %.**

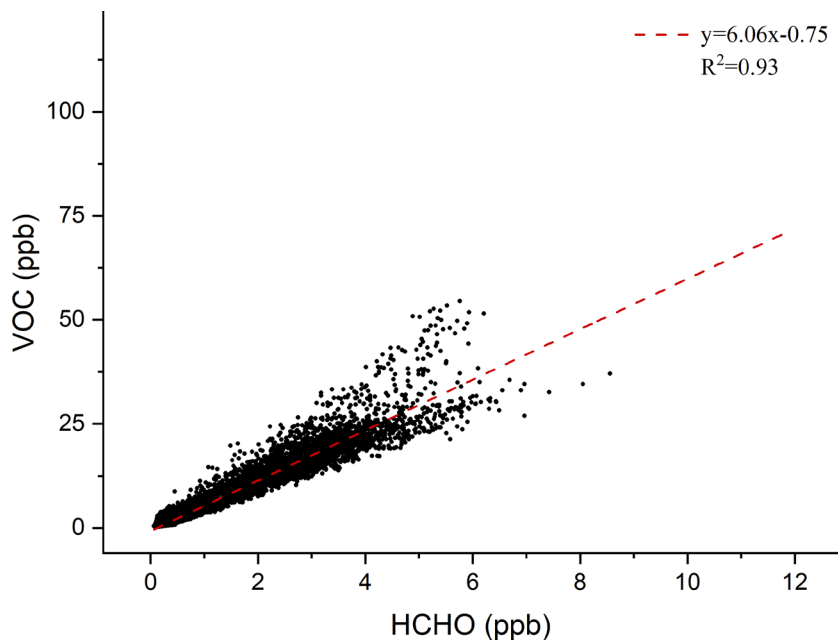

40

**Figure S4: Scatter plots comparing the simulated average daily HCHO and the total VOCs at all 117×117 grids from February 21 to April 24, 2020.**

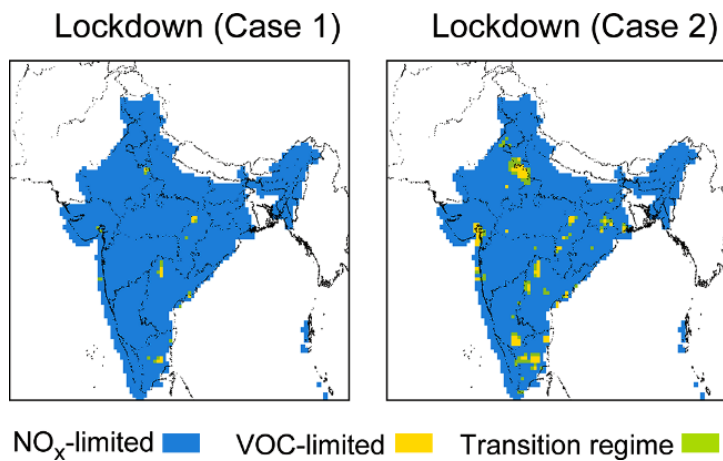

45

**Figure S5: Spatial distributions of O<sub>3</sub> production sensitivity in India from March 24 to April 24, 2020.**

### References

Emery, C., Tai, E., and Yarwood, G.: Enhanced meteorological modeling and performance evaluation for two Texas ozone episodes, 2001.

EPA: Guidance on the Use of Models and Other Analyses in Attainment Demonstrations for the 8-hour Ozone NAAQS, 2005.

- 50 EPA, U. E. P. A., Office of Air Quality Planning Standards: Guidance on the use of models and other analyses for demonstrating attainment of air quality goals for ozone, PM<sub>2.5</sub>, and regional haze, 2007.
